# Supplementary material for: Dynamic Changes of Peripheral Blood Markers Predict Prognosis of Patients with Advanced Non-Small Cell Lung Cancer Receiving Anti-PD-1/PD-L1 Treatment
Source: Research Square preprint supplement (doi:10.21203/rs.3.rs-1248240/v1), 2022-01-21
Supplement: Supplementary file 1 [file f1e36c86e96942c269f161c0.docx]

## Supplementary Materials

**Table S1** Relationship of dynamic changes of NLR and PLR with immune efficacy

| Variables | Non-response (n=13) | Response (n=47) | *χ2* | *p* value |
| --- | --- | --- | --- | --- |
| NLR dynamic changes |  |  |  |  |
| Low NLR0-Low NLR4c | 0 | 37 | 41.871 | <0.001 |
| High NLR0-High NLR4c | 8 | 5 |  |  |
| High NLR0-Low NLR4c | 0 | 5 |  |  |
| Low NLR0-High NLR4c | 5 | 0 |  |  |
| PLR dynamic changes |  |  |  |  |
| Low PLR0-Low PLR4c | 0 | 21 | 27.484 | <0.001 |
| High PLR0-High PLR4c | 11 | 6 |  |  |
| HighPLR0-Low PLR4c | 0 | 11 |  |  |
| LowPLR0-High PLR4c | 2 | 9 |  |  |
